# Supplementary material for: Sex modifies the relationship between age and neurovascular coupling in healthy adults
Source: PubMed Central journal article supplement (PMC10369153; doi:10.1177/0271678x231167753), 2023-04-05
Supplement: sj-pdf-1-jcb-10.1177_0271678X231167753.pdf [file sj-pdf-1-jcb-10.1177_0271678X231167753.pdf]

**Supplementary information:**

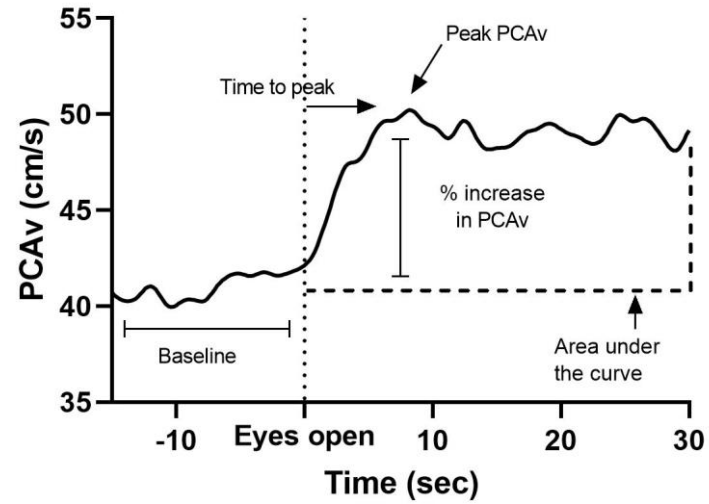

**Supplementary Figure 1.** Average representative trace of the posterior cerebral artery velocity averaged across 5 transitions during the visual stimulus, highlighting the outcomes derived from the neurovascular coupling assessment.

**Supplementary Table 1.** Peak cerebrovascular responses to visual stimulation

| Variables                      | Total                 |                   | Young<br>(18 - 35 years) |                        | Middle aged<br>(35 - 65 years) |                        | Older<br>(65 - 80 years) |                         |
|--------------------------------|-----------------------|-------------------|--------------------------|------------------------|--------------------------------|------------------------|--------------------------|-------------------------|
|                                | Males<br>(N=30)       | Females<br>(N=34) | Males<br>(N=10)          | Females<br>(N=10)      | Males<br>(N=12)                | Females<br>(N=14)      | Males<br>(N=8)           | Females<br>(N=10)       |
| PCAv (cm/s)                    | 45.5±9.9 <sup>†</sup> | 48.8±12.0         | 44.0±9.3 <sup>b</sup>    | 57.6±12.7 <sup>b</sup> | 48.5±10.6 <sup>c</sup>         | 47.9±9.7 <sup>c</sup>  | 42.9±9.3 <sup>b,c</sup>  | 38.4±6.3 <sup>b,c</sup> |
| CVRi (mmHg/cms <sup>-1</sup> ) | 2.6±0.6               | 2.6±0.8           | 2.5±0.5 <sup>b</sup>     | 2.0±0.8 <sup>b</sup>   | 2.5±0.6 <sup>c</sup>           | 2.7±0.7 <sup>c</sup>   | 3.0±0.8 <sup>b,c</sup>   | 3.4±0.5 <sup>b,c</sup>  |
| CVCi (cms <sup>-1</sup> /mmHg) | 0.5±0.1 <sup>†</sup>  | 0.5±0.2           | 0.5±0.1 <sup>a,b</sup>   | 0.7±0.2 <sup>a,b</sup> | 0.5±0.1 <sup>a,c</sup>         | 0.5±0.1 <sup>a,c</sup> | 0.4±0.1 <sup>b,c</sup>   | 0.4±0.1 <sup>b,c</sup>  |
| NVC (%)                        | 14.1±9.2              | 14.5±7.6          | 15.4±9.3                 | 10.3±5.4               | 15.2±8.4                       | 14.9±8.1               | 11.0±10.9                | 19.3±6.8                |
| MAP (mmHg)                     | 97±10*                | 109±13            | 96±10                    | 105±15                 | 97±11                          | 120±11                 | 99±10                    | 113±14                  |
| PCAv Amp (cm/s)                | 6.3±2.5               | 6.0±2.6           | 6.4±2.4                  | 4.8±1.9                | 7.2±1.6                        | 6.8±3.1                | 5.1±3.3                  | 6.0±2.3                 |
| PCAv $\tau$ (s)                | 4.6±2.3               | 4.3±4.2           | 4.4±2.1                  | 2.6±2.1                | 4.5±1.5                        | 5.8±4.9                | 4.8±3.5                  | 3.9±1.6                 |
| PCAv TD (s)                    | 0.2±1.2*              | 2.7±3.3           | 0.08±1.1                 | 3.5±1.3                | 0.4±1.4                        | 3.3±4.4                | 0.2±1.0                  | 1.0±0.6                 |
| PCAv MRT (s)                   | 4.8±1.8               | 7.6±5.1           | 5.0±1.9                  | 7.1±1.7                | 4.9±1.3                        | 9.1±6.5                | 4.6±2.6                  | 4.9±4.9                 |

Data presented as mean  $\pm$  SD deviations. Data were compared using a two-way ANOVA with main effects of age (males, females) and sex (young, middle, older). Asterix \* indicates significant difference between males and females ( $P < 0.05$ ). When main effect of age is present post-hoc pairwise comparisons (Bonferroni) reveal where significant differences lie: a=young vs middle, b=young vs older, c=middle vs older. Symbol <sup>†</sup> indicates significant age by sex interaction effect ( $P < 0.05$ ). Pairwise comparisons for the interaction effects for peak PCAv and CVC revealed a difference between males and females for young adults only ( $P = 0.02$  for both). In females there was a significant difference between for PCAv between all age groups ( $P \leq 0.04$ ). For peak CVC, in females there was a difference between young adults compared to middle ( $P = 0.001$ ) and older aged adults ( $P < 0.001$ ). PCAv, posterior cerebral artery; CVRi, cerebrovascular resistance index; CVCi, cerebrovascular conductance index; NVC, neurovascular coupling; MAP, mean arterial pressure; Amp, amplitude;  $\tau$ , time constant.
